# Supplementary material
Source: Springer Nature journal article supplement (https://www.springermedizin.de/resource/supplementary/12936_2012_2561_MOESM12_ESM.pdf/9543182)

**A**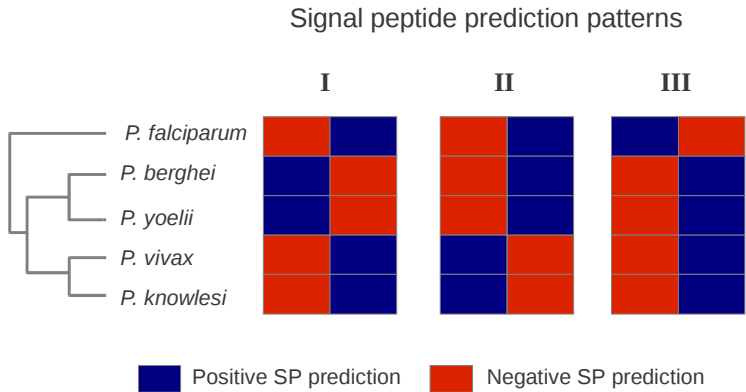**B**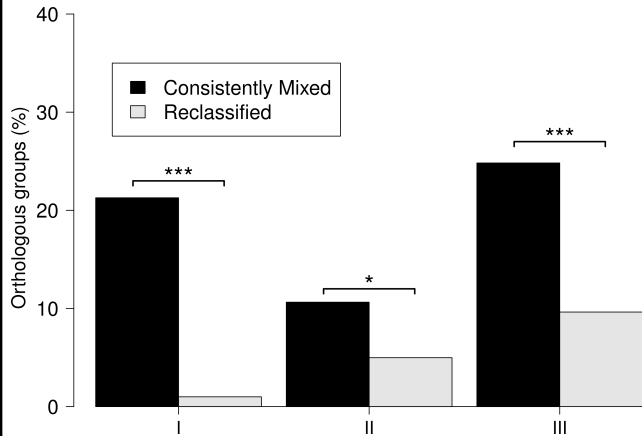

Supplement: MOESM12 [file 9543182]
